# Supplementary material for: Hydrophobic Components in Light-Yellow Pulp Sweet Potato (Ipomoea batatas (L.) Lam.) Tubers Suppress LPS-Induced Inflammatory Responses in RAW264.7 Cells via Activation of the Nrf2 Pathway
Source: MDPI journal article supplement (doi:10.3390/nu16040563), 2024-02-18
Supplement: s1 [file s1]

Supplemental Figure

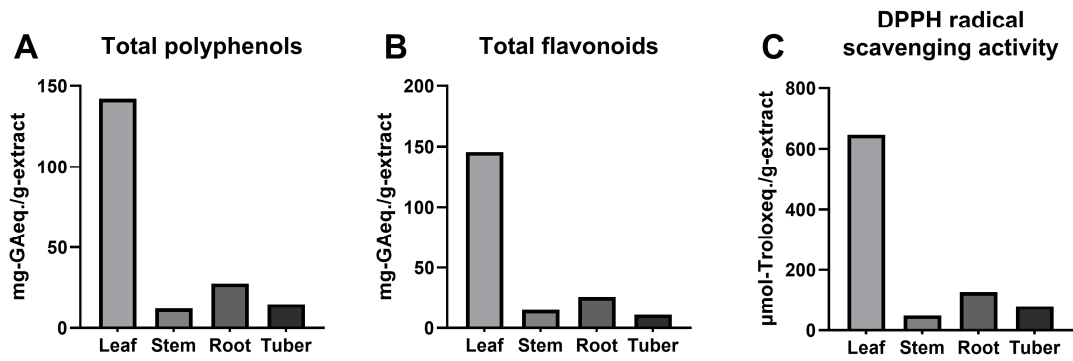

**Figure S1.** Total polyphenols, total flavonoids, and DPPH radical scavenging activity of sweet potato extracts

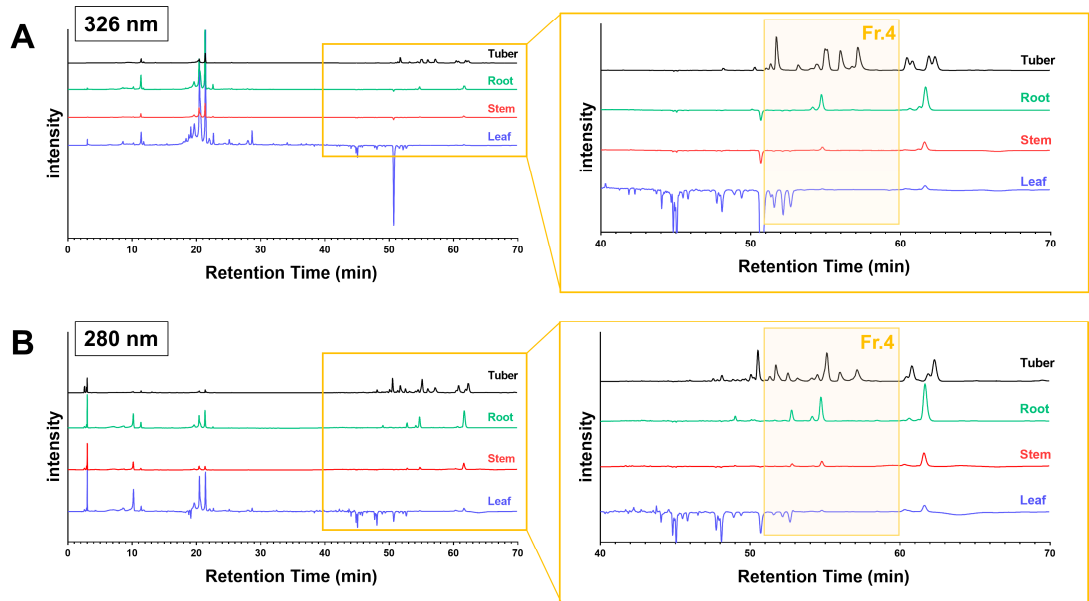

**Figure S2.** Comparison of peaks observed in DAD-HPLC analysis of sweet potato extracts
